## CORRECTION

# Correction: Phenology of *Trichodesmium* spp. blooms in the Great Barrier Reef lagoon, Australia, from the ESA-MERIS 10-year mission

The *PLOS ONE* Staff

## Notice of republication

This article was republished on February 25, 2019 to correct for errors introduced during the typesetting process. The publisher apologizes for the errors. Please download this article again to view the correct version. The originally published, uncorrected article and the republished, corrected article are provided here for reference.

## Supporting information

### S1 File. Originally published, uncorrected article.

(PDF)

### S2 File. Republished, corrected article.

(PDF)

## Reference

1. Blondeau-Patissier D, Brando VE, Lønborg C, Leahy SM, Dekker AG (2018) Phenology of *Trichodesmium* spp. blooms in the Great Barrier Reef lagoon, Australia, from the ESA-MERIS 10-year mission. *PLoS ONE* 13(12): e0208010. <https://doi.org/10.1371/journal.pone.0208010> PMID: 30550568

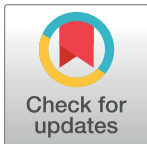

## OPEN ACCESS

**Citation:** The *PLOS ONE* Staff (2019) Correction: Phenology of *Trichodesmium* spp. blooms in the Great Barrier Reef lagoon, Australia, from the ESA-MERIS 10-year mission. *PLoS ONE* 14(3): e0213559. <https://doi.org/10.1371/journal.pone.0213559>

**Published:** March 5, 2019

**Copyright:** © 2019 The PLOS ONE Staff. This is an open access article distributed under the terms of the [Creative Commons Attribution License](https://creativecommons.org/licenses/by/4.0/), which permits unrestricted use, distribution, and reproduction in any medium, provided the original author and source are credited.
